# Supplementary material
Source: PubMed Central journal article supplement (PMC7778672)
Supplement: 13205_2020_2505_MOESM1_ESM.pdf [file 13205_2020_2505_MOESM1_ESM.pdf]

**Supplementary Table 1.** Sequence identity among the expressed protein and other  $\alpha$ -amylase proteins

| Accession number | Species                             | $\alpha$ -amylase family and subfamily | Sequence identity (%) |
|------------------|-------------------------------------|----------------------------------------|-----------------------|
| AWL05875.1       | <i>Massilia oculi</i>               | GH13_6                                 | 98.50                 |
| EKU83291.1       | <i>Massilia timonae</i>             | GH13_6                                 | 90.52                 |
| QJE00754.1       | <i>Duganella</i> sp.                | GH13_6                                 | 78.50                 |
| QBI00971.1       | <i>Massilia albidiflava</i>         | GH13_6                                 | 75.00                 |
| QBQ35479.1       | <i>Massilia plicata</i>             | GH13_6                                 | 74.37                 |
| QBE61772.1       | <i>Massilia lutea</i>               | GH13_6                                 | 73.00                 |
| AVR97140.1       | <i>Massilia-armeniaca</i>           | GH13_6                                 | 72.50                 |
| AXA90592.1       | <i>Massilia</i> sp.                 | GH13_6                                 | 71.75                 |
| WP_147953147.1   | <i>Empedobacter haloabium</i>       | GH13_6                                 | 71.75                 |
| QGX39990.1       | <i>Permianibacter aggregans</i>     | GH13_6                                 | 59.85                 |
| ACE84223.1       | <i>Cellvibrio japonicus</i>         | GH13_6                                 | 57.54                 |
| AII00648.1       | <i>Corallocooccus</i> sp.           | GH13_6                                 | 56.52                 |
| AKJ00982.1       | <i>Archangium gephyra</i>           | GH13_6                                 | 55.73                 |
| QBC45185.1       | <i>Iodobacter fluviatilis</i>       | GH13_6                                 | 54.99                 |
| AFE09509.1       | <i>Corallocooccus coralloides</i>   | GH13_6                                 | 54.73                 |
| ADO70169.1       | <i>Stigmatella aurantiaca</i>       | GH13_6                                 | 53.81                 |
| ATB36510.1       | <i>Cystobacter fuscus</i>           | GH13_6                                 | 53.44                 |
| ABD79827.1       | <i>Saccharophagus degradans</i>     | GH13_6                                 | 52.43                 |
| ATB31363.1       | <i>Melittangium boletus</i>         | GH13_6                                 | 51.78                 |
| ADN02538.1       | <i>Spirochaeta thermophila</i>      | GH13_6                                 | 48.73                 |
| P04063.3         | <i>Hordeum vulgare</i>              | GH13_6                                 | 43.12                 |
| ACF88424.1       | <i>Zea mays</i>                     | GH13_6                                 | 43.12                 |
| CAB36742.1       | <i>Arabidopsis thaliana</i>         | GH13_6                                 | 42.93                 |
| AAA16513.1       | <i>Cuscuta reflexa</i>              | GH13_6                                 | 42.30                 |
| AAA34259.1       | <i>Triticum aestivum</i>            | GH13_6                                 | 42.43                 |
| AAA33885.1       | <i>Oryza sativa</i>                 | GH13_6                                 | 42.18                 |
| BAA33879.1       | <i>Phaseolus vulgaris</i>           | GH13_6                                 | 42.13                 |
| BAC76729.1       | <i>Vigna angularis</i>              | GH13_6                                 | 41.82                 |
| CAA37217.1       | <i>Vigna mungo</i>                  | GH13_6                                 | 41.82                 |
| CAA09323.1       | <i>Avena fatua</i>                  | GH13_6                                 | 41.16                 |
| VFA42089.1       | <i>Chryseobacterium indologenes</i> | GH13_7                                 | 32.58                 |
| ABQ04980.1       | <i>Flavobacterium johnsoniae</i>    | GH13_7                                 | 31.46                 |
| QEE48109.1       | <i>Flavobacterium alkalisoli</i>    | GH13_7                                 | 30.14                 |
| AXO81475.1       | <i>Olleya aquimaris</i>             | GH13_7                                 | 29.41                 |
| ADQ17984.1       | <i>Leadbetterella byssophila</i>    | GH13_7                                 | 29.08                 |
| AIF68502.1       | <i>Palaeococcus pacificus</i>       | GH13_7                                 | 28.93                 |
| ATA94000.1       | <i>Capnocytophaga canimorsus</i>    | GH13_7                                 | 27.45                 |
| CAL67106.1       | <i>Gramella forsetii</i>            | GH13_7                                 | 27.25                 |
| BAA21130.1       | <i>Pyrococcus</i> sp.               | GH13_7                                 | 27.02                 |
| Q5JER7           | <i>Thermococcus kodakarensis</i>    | GH13_7                                 | 27.02                 |
| NP_578206.1      | <i>Pyrococcus furiosus</i>          | GH13_7                                 | 26.74                 |
| AIU69287.1       | <i>Thermococcus eurythermalis</i>   | GH13_7                                 | 26.74                 |
| ABA26948.1       | <i>Thermococcus onnurineus</i>      | GH13_7                                 | 26.69                 |
| P00692           | <i>Bacillus amyloliquefaciens</i>   | GH13_5                                 | 22.75                 |
| P06278           | <i>Bacillus licheniformis</i>       | GH13_5                                 | 22.47                 |
